# Supplementary material for: Comparative Microscopic, Transcriptome and IAA Content Analyses Reveal the Stem Growth Variations in Two Cultivars Ilex verticillata
Source: Plants (Basel). 2023 May 10;12(10):1941. doi: 10.3390/plants12101941 (PMC10220661; doi:10.3390/plants12101941)
Supplement: Supplementary file 1 [file plants-12-01941-s001.zip › plants-2365620-supplementary.pdf]

## Supplementary Materials

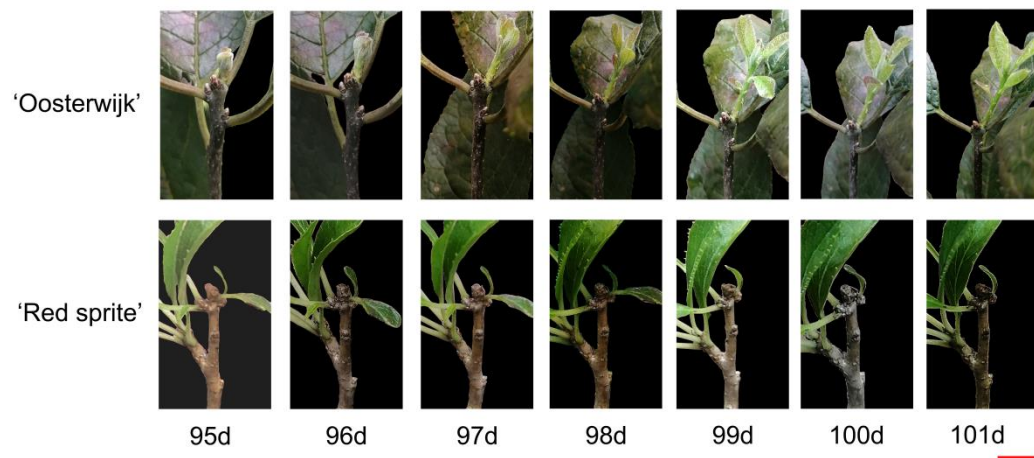

**Supplementary Figure S1.** Phenotypic observation of the autumn new shoots of 'Oosterwijk' and 'Red sprite'. Phenotypic differences in new shoots between 'Oosterwijk' and 'Red sprite' were observed from the 95d to 101d (29<sup>th</sup> May 2021 is used as the starting point for time calculations). Scale bar=1cm.

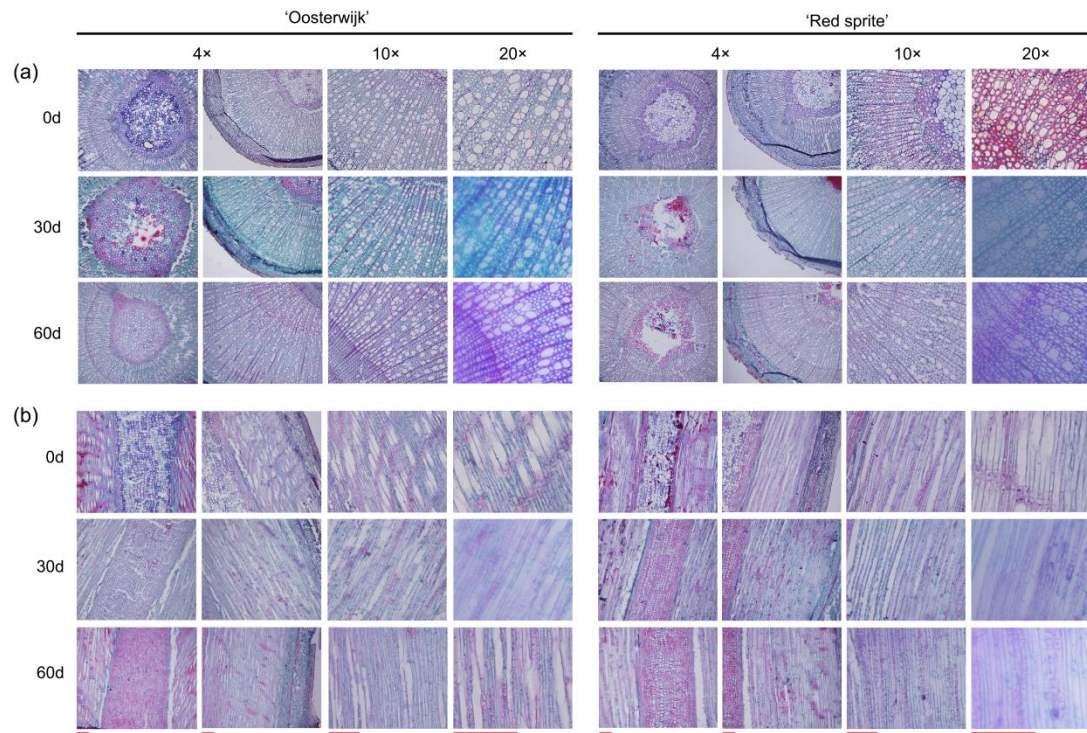

**Supplementary Figure S2.** Cytological section observation of new branches in current year of *Ilex verticillata* 'Oosterwijk' and 'Red sprite'. Scale bar=200 $\mu$ m. (a) the cross sections of the stems. The sections were observed under positive fluorescence microscope 4 $\times$ , 10 $\times$  and 20 $\times$  magnification, respectively. Scale bar=200 $\mu$ m. (b) the longitudinal sections of the stems. The sections were observed under positive fluorescence microscope at 4 $\times$ , 10 $\times$  and 20 $\times$  magnification, respectively. Scale bar=200 $\mu$ m.

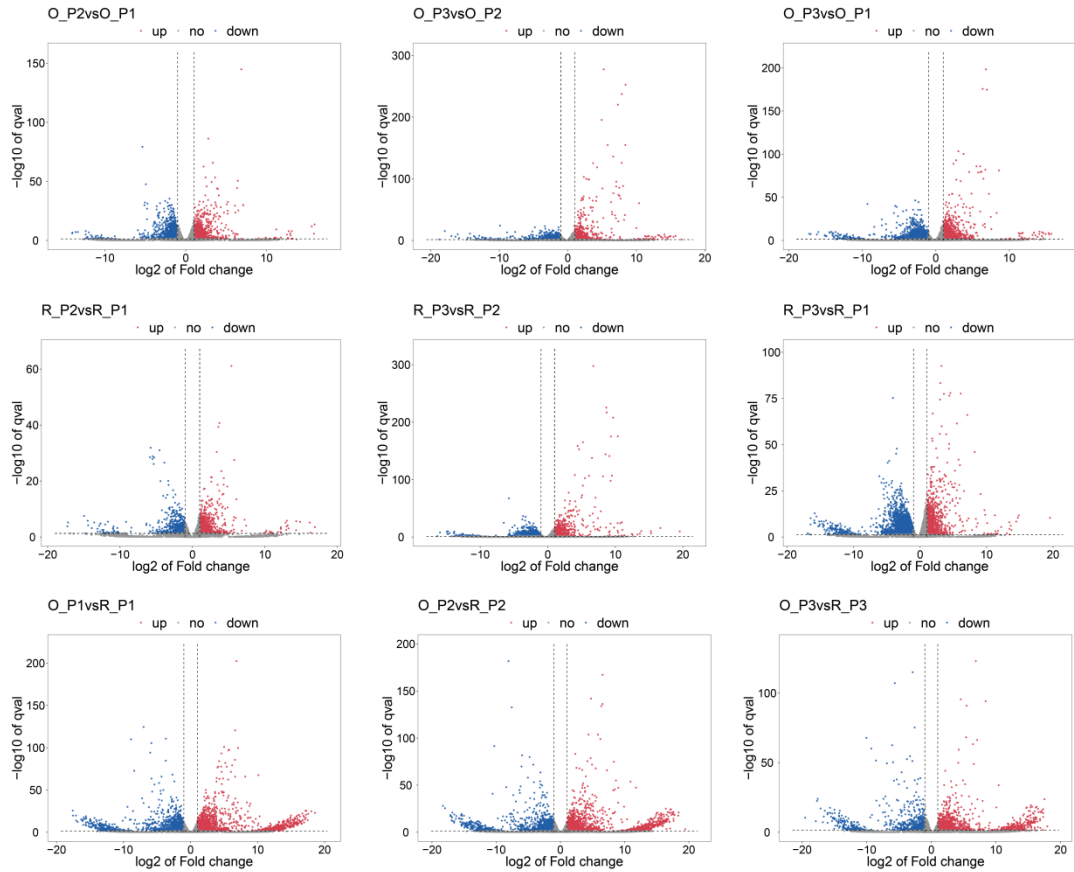

**Supplementary Figure S3.** DEGs volcano plot in each comparison group. O\_P2vsO\_P1, O\_P3vsO\_P2, O\_P3vsO\_P1, R\_P2vsR\_P1, R\_P3vsR\_P2, R\_P3vsR\_P1, O\_P1vsR\_P1, O\_P2vsR\_P2 and O\_P3vsR\_P3. O indicates 'Oosterwijk', R indicates 'Red sprite'; P1, P2 and P3 indicate Phase1 (0d), Phase2 (30d) and Phase3 (60d). The up-regulated and down-regulated genes are represented by red and blue dots, respectively, and the gray dots represent genes with no significant difference in expression.

O\_P2vsO\_P1

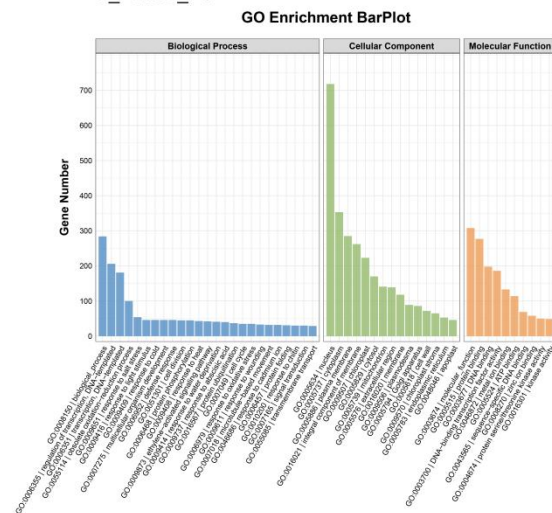

## O\_P3vsO\_P2

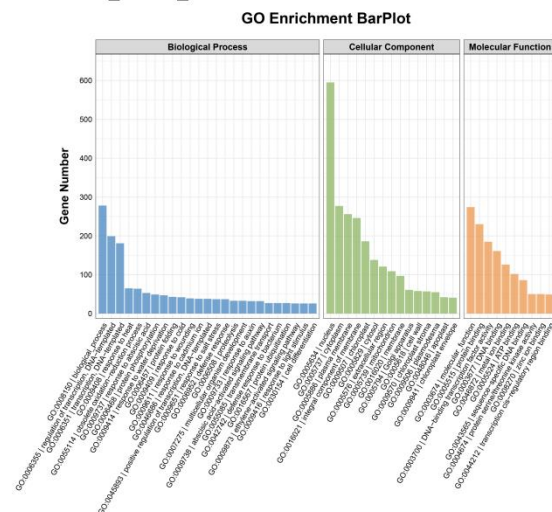

## O\_P3vsO\_P1

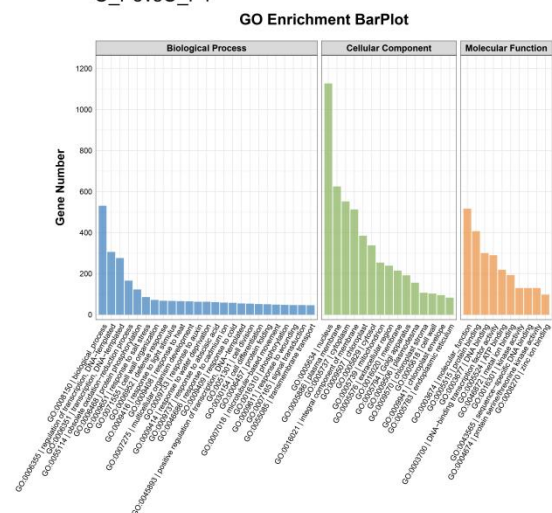

**Supplementary Figure S4.** GO functional enrichment analysis of DEGs in O\_P2vsO\_P1, O\_P3vsO\_P2 and O\_P3vsO\_P1 groups. O indicates 'Oosterwijk'; P1, P2 and P3 indicate Phase1 (0d), Phase2 (30d) and Phase3 (60d).



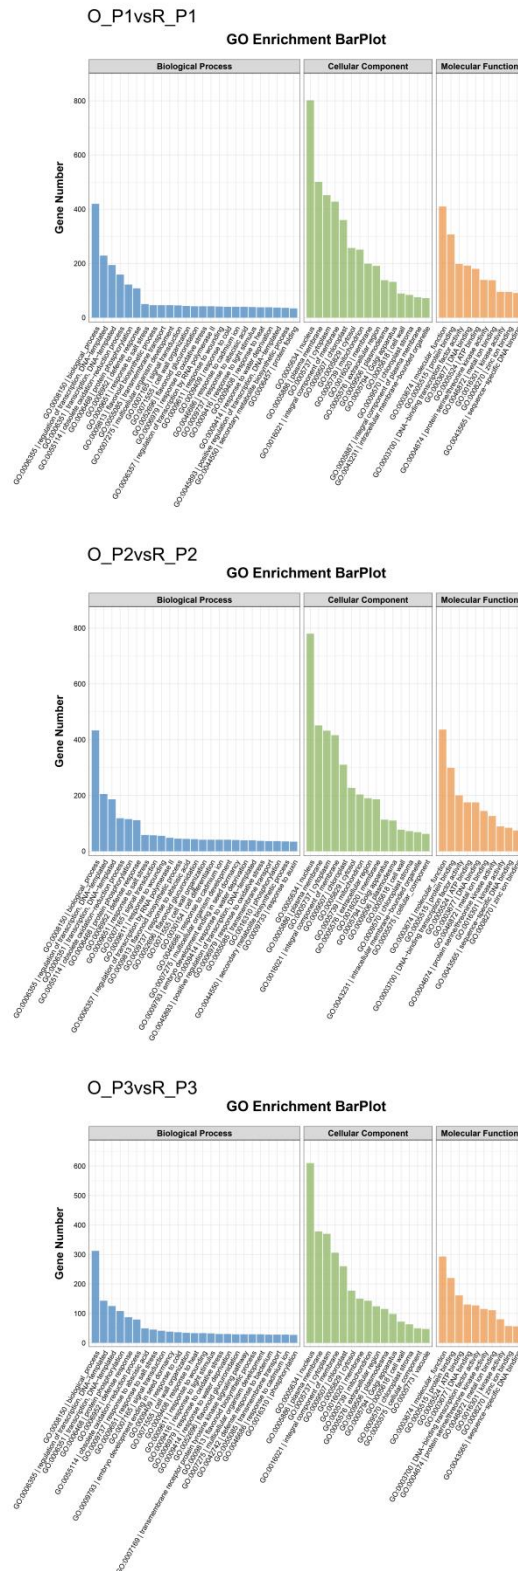

**Supplementary Figure S6.** GO functional enrichment analysis of DEGs in O\_P1vsR\_P1, O\_P2vsR\_P2 and O\_P3vsR\_P3 groups. O indicates 'Oosterwijk', R indicates 'Red sprite'. P1, P2 and P3 indicate Phase1 (0d), Phase2 (30d) and Phase3 (60d).

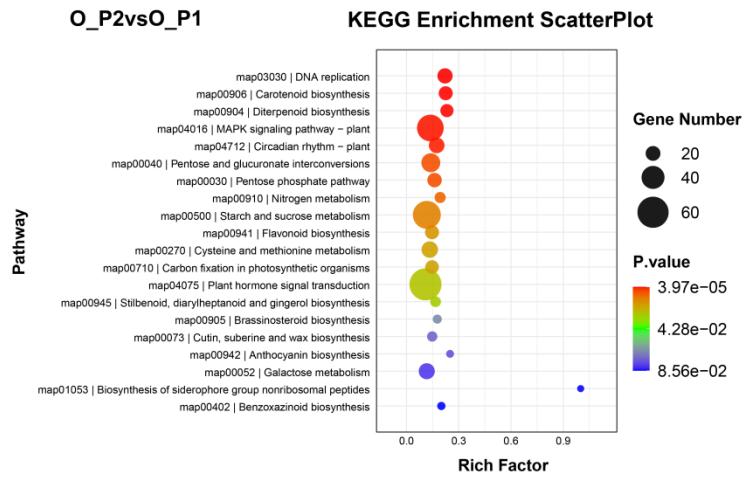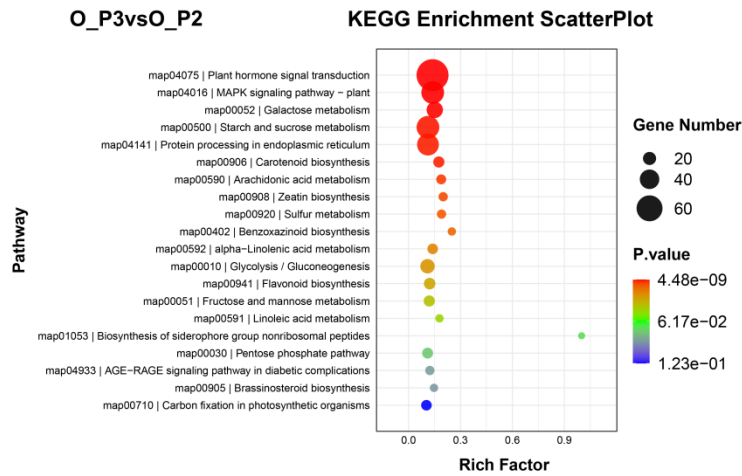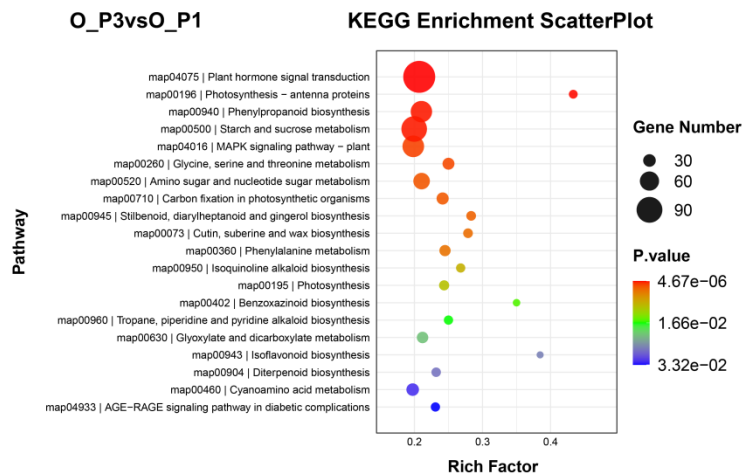

**Supplementary Figure S7.** KEGG functional enrichment analysis of DEGs in O\_P2vsO\_P1, O\_P3vsO\_P2 and O\_P3vsO\_P1 groups. O indicates 'Oosterwijk'; P1, P2 and P3 indicate Phase1 (0d), Phase2 (30d) and Phase3 (60d).

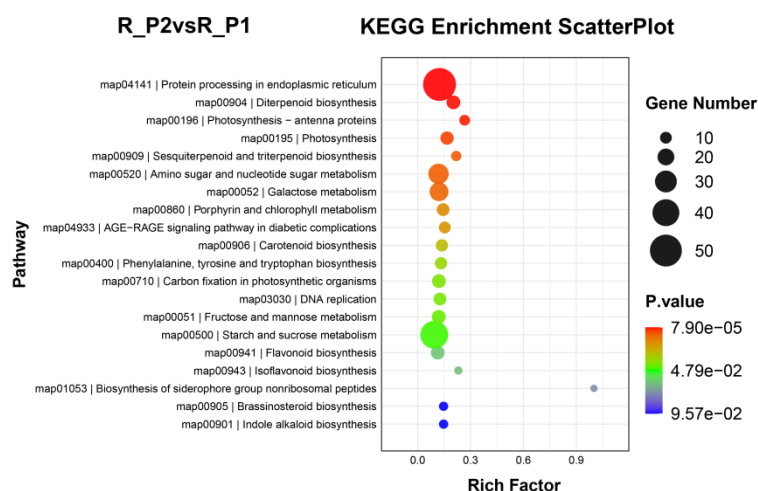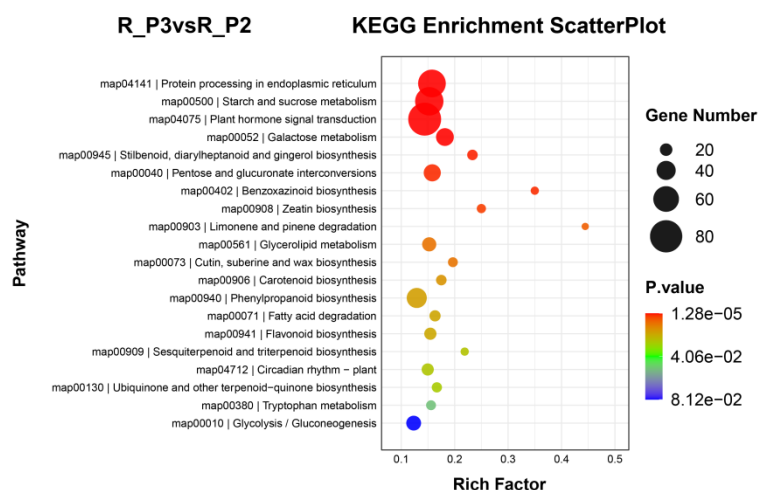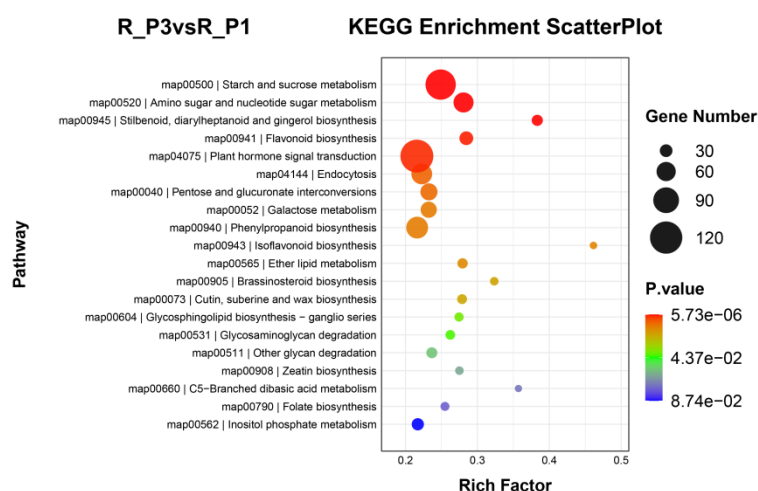

**Supplementary Figure S8.** KEGG functional enrichment analysis of DEGs in R\_P2vsR\_P1, R\_P3vsR\_P2 and R\_P3vsR\_P1 groups. R indicates ‘Red sprite’; P1, P2 and P3 indicate Phase1 (0d), Phase2 (30d) and Phase3 (60d).

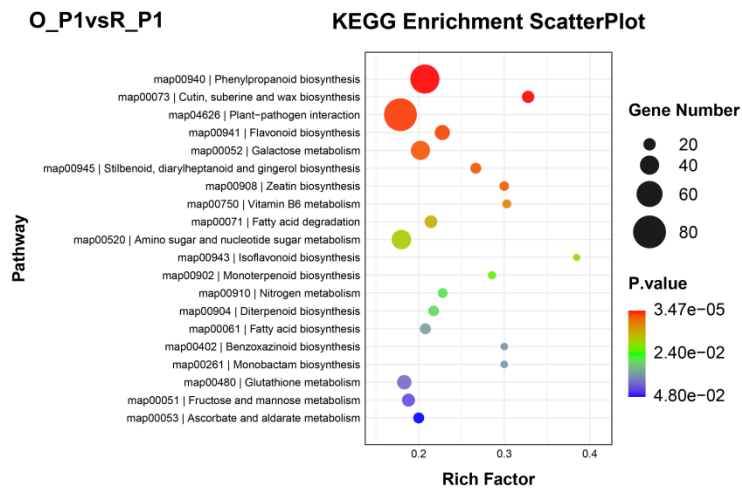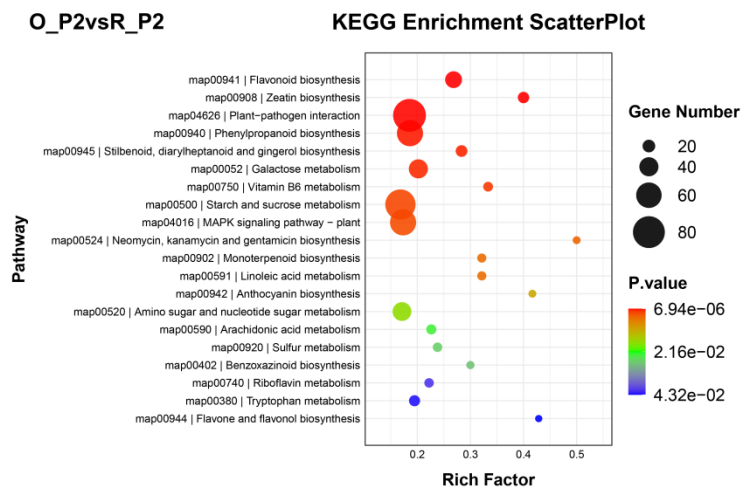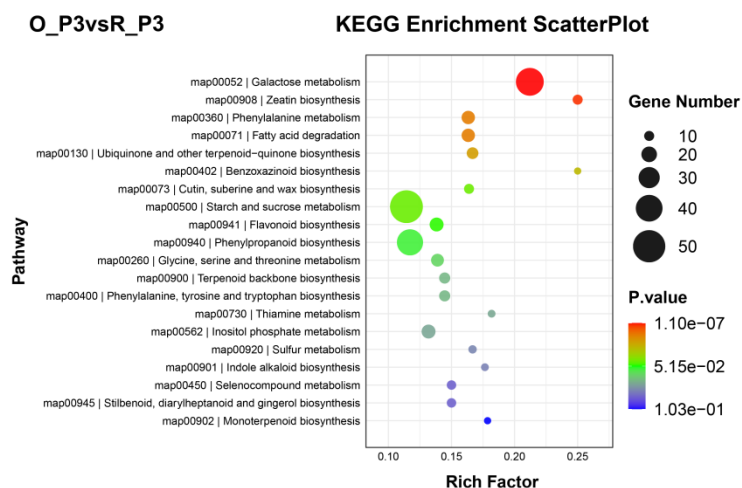

**Supplementary Figure S9.** KEGG functional enrichment analysis of DEGs in O\_P1vsR\_P1, O\_P2vsR\_P2 and O\_P3vsR\_P3 groups. O indicates 'Oosterwijk', R indicates 'Red sprite'; P1, P2 and P3 indicate Phase1 (0d), Phase2 (30d) and Phase3 (60d).

**Supplementary Table S1.** Sample sequencing data collation and align information between samples and *Ilex verticillata*.

| Sample | Valid Reads | Valid Ratio (%) | Valid data base | Mapped Reads rate (%) |
|--------|-------------|-----------------|-----------------|-----------------------|
| O_P1_1 | 43051878    | 94.76           | 6.46G           | 87.87                 |
| O_P1_2 | 45824950    | 95.16           | 6.87G           | 88.03                 |
| O_P1_3 | 47357354    | 92.24           | 7.10G           | 88.57                 |
| O_P2_1 | 44570834    | 94.29           | 6.69G           | 87.65                 |
| O_P2_2 | 42866468    | 95.13           | 6.43G           | 87.63                 |
| O_P2_3 | 45874352    | 95.18           | 6.88G           | 87.49                 |
| O_P3_1 | 44424442    | 94.26           | 6.66G           | 87.02                 |
| O_P3_2 | 42828750    | 95.23           | 6.42G           | 85.71                 |
| O_P3_3 | 45800894    | 95.15           | 6.87G           | 86.26                 |
| R_P1_1 | 45216334    | 95.57           | 6.78G           | 84.05                 |
| R_P1_2 | 39501936    | 92.43           | 5.93G           | 83.95                 |
| R_P1_3 | 44542428    | 95.13           | 6.68G           | 84.49                 |
| R_P2_1 | 39482178    | 92.98           | 5.92G           | 82.49                 |
| R_P2_2 | 42653880    | 91.49           | 6.40G           | 83.28                 |
| R_P2_3 | 45285478    | 94.93           | 6.79G           | 83.31                 |
| R_P3_1 | 38128536    | 93.12           | 5.72G           | 81.06                 |
| R_P3_2 | 31673784    | 93.96           | 4.75G           | 82.57                 |
| R_P3_3 | 40175710    | 94.40           | 6.03G           | 83.19                 |

<sup>s1</sup> O\_P\_1, O\_P\_2, O\_P\_3 represent the stems of ‘Oosterwijk’ at 0d, 30d and 60d, respectively; R\_P\_1, R\_P\_2, R\_P\_3 represent the stems of ‘Red sprite’ at 0d, 30d and 60d, respectively. The last number for each cell represents the three biological replicates

**Supplementary Table S2.** Numbers of genes in 25 modules.

| Module color  | Gene numbers |
|---------------|--------------|
| Black         | 1170         |
| Blue          | 4131         |
| Brown         | 2570         |
| Cyan          | 413          |
| Darkgreen     | 79           |
| Darkgrey      | 37           |
| Darkred       | 88           |
| Darkturquoise | 53           |
| Green         | 1411         |
| Greenyellow   | 638          |
| Grey          | 24           |
| Grey60        | 233          |
| Lightcyan     | 246          |
| Lightgreen    | 212          |
| Lightyellow   | 181          |
| Magenta       | 801          |
| Midnightblue  | 329          |
| Pink          | 1158         |
| Purple        | 680          |
| Red           | 1302         |
| Royalblue     | 89           |
| Salmon        | 461          |
| Tan           | 492          |
| Turquoise     | 5959         |
| Yellow        | 1438         |
